# Supplementary material for: Enhancing the separation efficiency of photo-induced carriers in a Bi2S3/BiOCl heterostructure by cooperative influence of oxygen vacancies and the interfacial electric field
Source: Royal Society of Chemistry journal article supplement (doi:10.1039/d2nj00976e), 2022-01-01
Supplement: d2nj00976e1.pdf [file d2nj00976e1.pdf]

# Enhancing separation efficiency of photo-induced carriers in Bi<sub>2</sub>S<sub>3</sub>/BiOCl heterostructure by the cooperative of oxygen vacancies and interfacial electric field

Chengming Deng<sup>a</sup>, Haiming Xu<sup>a\*</sup>, Hailan Qin<sup>a</sup>, Dongsheng Xia<sup>ab\*</sup>, Dongya Li<sup>b</sup>, Qilin Yu<sup>c</sup>,  
Dahong Chen<sup>d</sup>, Yi Zheng<sup>e</sup>, Yujia Wang<sup>a</sup>

<sup>a</sup> School of Environmental Engineering, Wuhan Textile University, Wuhan, 430200, PR China

<sup>b</sup> Engineering Research Center Clean Production of Textile Dyeing and Printing, Ministry of Education, Wuhan, 430200, PR China

<sup>c</sup> Key Laboratory of Molecular Microbiology and Technology, Ministry of Education, Department of Microbiology, College of Life Sciences, Nankai University, Tianjin 300071, PR China

<sup>d</sup> State Key Laboratory of Urban Water Resource and Environment, School of Environment, Harbin Institute of Technology, Harbin 150090, PR China

<sup>e</sup> School of Petrochemical Technology, Lanzhou University of Technology, Lanzhou 730050, PR China

E-mail: xulianhe@163.com; dongsheng\_xia@wtu.edu.cn

Mott-Schottky (M-S) analysis:

The 0.2 M Na<sub>2</sub>SO<sub>4</sub> solution was used as the electrolyte solution (pH=7). 10 mg of the catalyst was dispersed in 50 μL solution (10:1 by volume of ethanol and Nafion PFSA Polymer), and then uniformly spread on indium-doped tin oxide (ITO) glass (10×20 mm) to dry naturally, and then a working electrode was obtained. Mott-Schottky (M-S) plots were generated under dark with a voltage of 10 mV at a frequency of 1 kHz. In the M-S plot, the flat band potential and the carrier densities of the photoelectrode are measured according to following equation:

$$C^{-2} = (2/\epsilon\epsilon_0qN_q) (E - E_{FB} - kT/q) \quad \text{Equation S1}$$

$$\text{slope} = 2/q\epsilon\epsilon_0A^2N_q \quad \text{Equation S2}$$

Where, C is the space charge capacitance in the semiconductor (obtained from M-S curves), q is the electron charge, ε<sub>0</sub> is the vacuum permittivity (8.85×10<sup>-12</sup> F m<sup>-1</sup>), ε represents the dielectric constant of semiconductor (for BiS/BOC heterojunctions, this value is a fixed value), N<sub>q</sub> is the charge donor density (cm<sup>-3</sup>), E is the electrode potential, E<sub>FB</sub> is fiat band potential, k represents Boltz-mann's constant (1.38×10<sup>-23</sup> J K<sup>-1</sup>), T is the absolute temperature.

The slope (k) of the linear part of the differential capacitance potential curve at a given frequency was used to estimate their charge carrier density. From equations S1 and S2, it can be seen that for BiS/BOC heterojunction, other physical quantities in the equation are fixed values, and the charge donor density (N<sub>q</sub>) of BiS/BOC heterojunction is negatively correlated with the obtained k value. That is, the smaller the k value, the larger the N<sub>q</sub>, and the greater the photogenerated carrier density of the material; on the contrary, the larger the k value, the smaller the N<sub>q</sub>, and the smaller the photogenerated carrier density of the material.

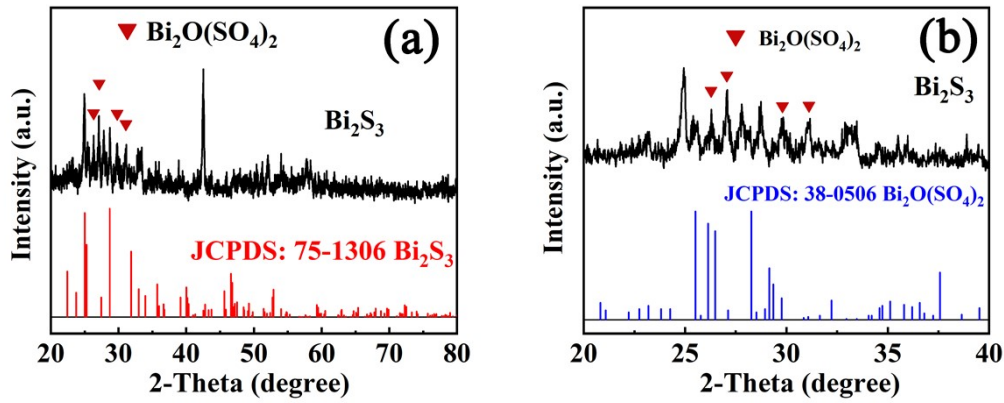

Fig. S1 (a-b) XRD patterns of  $\text{Bi}_2\text{S}_3$ .

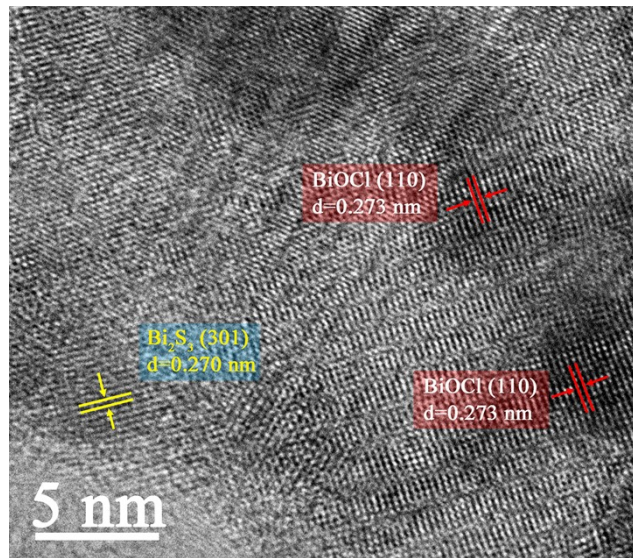

Fig. S2 The HRTEM image of BiS/BOC-4.

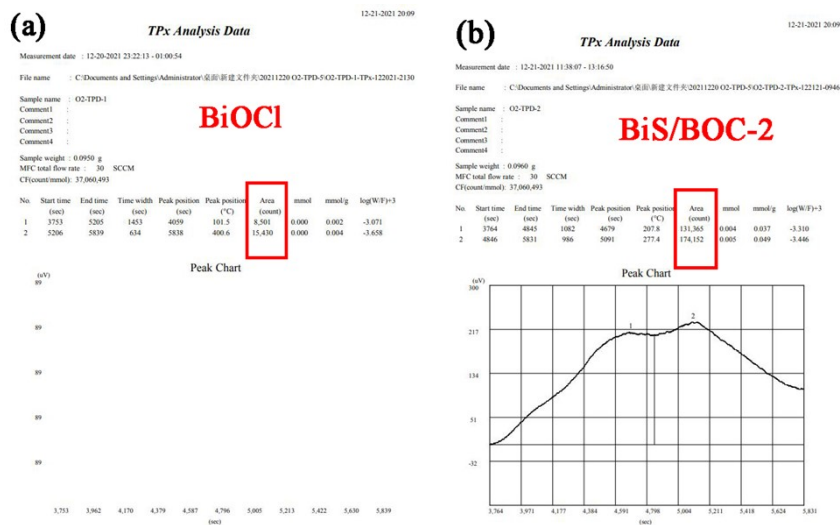

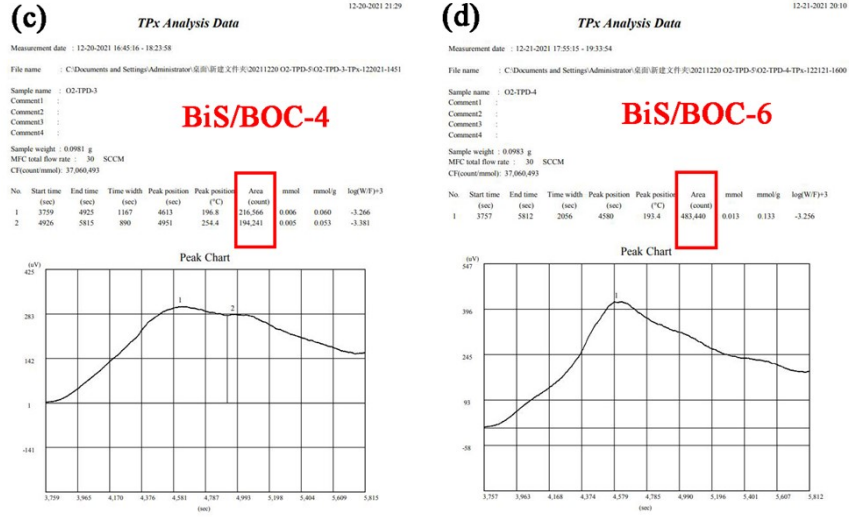

Fig. S3 The O<sub>2</sub>-TPD profile of (a) BiOCl, (b) BiS/BOC-2, (c) BiS/BOC-4 and (d) BiS/BOC-6.

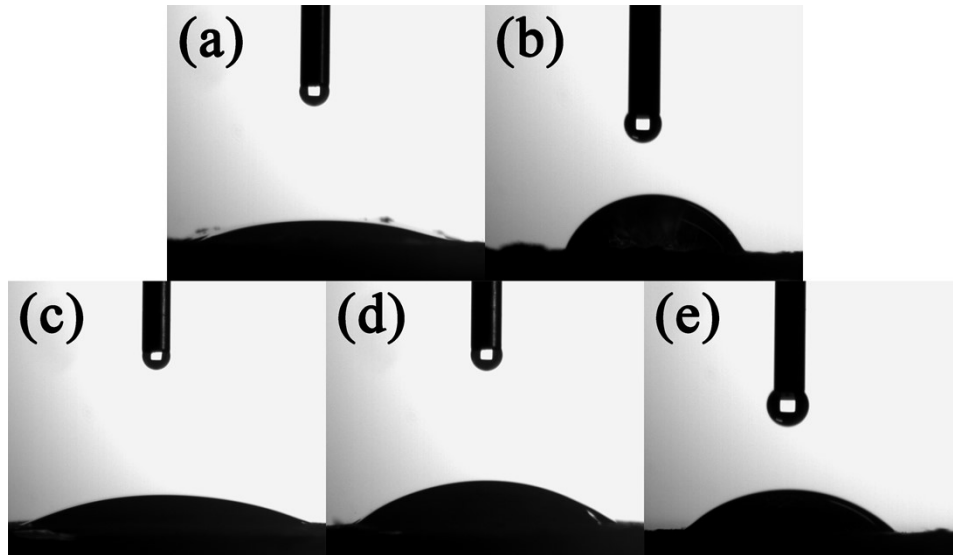

Fig. S4 Water contact angle of the as-prepared samples: (a) BiOCl, (b) Bi<sub>2</sub>S<sub>3</sub>, (c) BiS/BOC-2, (d) BiS/BOC-4, (e) BiS/BOC-6.

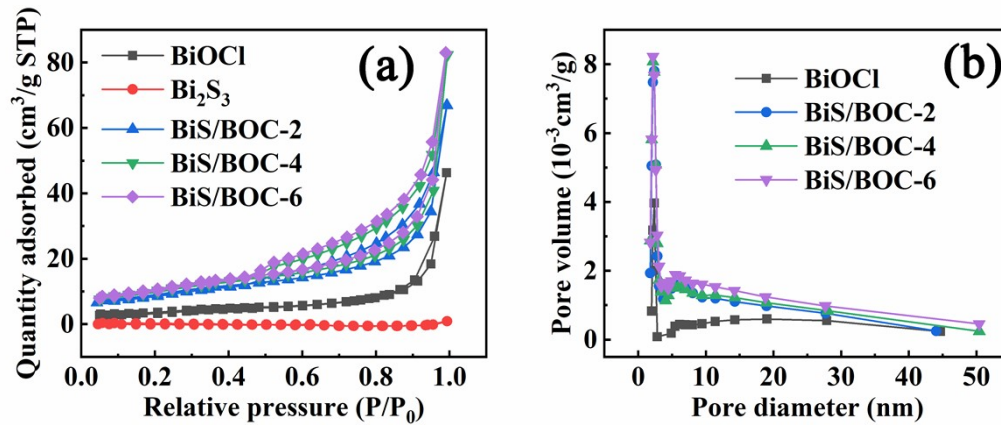

Fig. S5 (a) Nitrogen sorption isotherms curves and (b) pore volume distribution plots of the as-prepared samples.

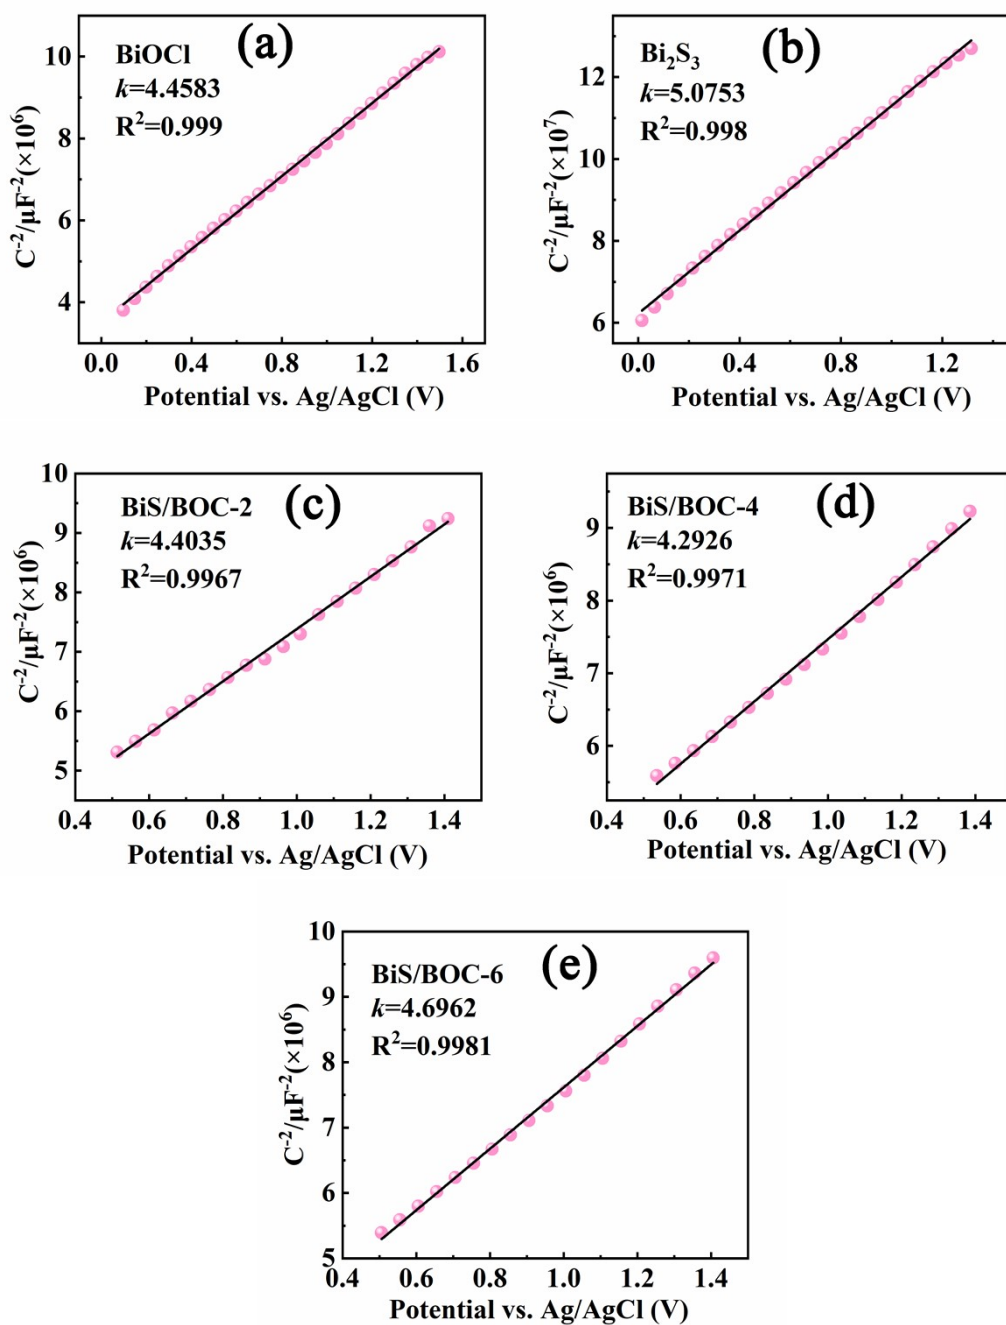

**Fig. S6** (a-e) The slope ( $k$ ) of the linear part of the differential capacitance potential curve at a given frequency (1000 KHz) for the prepared sample.

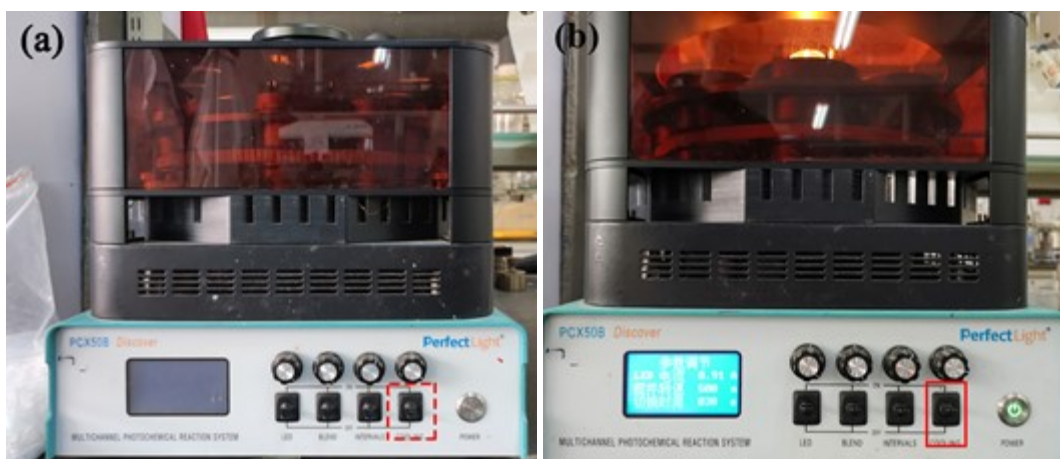

Fig. S7. Photocatalytic reaction conditions (a) dark reaction, (b) light reaction.

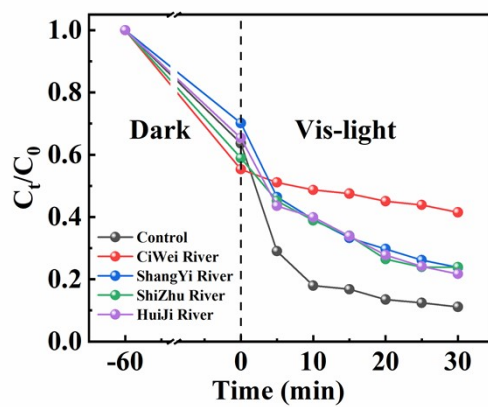

Fig. S8 Photocatalytic activity of BiS/BOC-4 for purify TC-HCl (20 mg/L) in different natural water matrices.
